# Effect of rapamycin on mitochondria and lysosomes in fibroblasts from patients with mtDNA mutations

Running head: Rapamycin treatment in mtDNA patient fibroblasts

Nashwa Cheema <sup>1</sup>, Jessie M. Cameron <sup>2</sup>, and David A. Hood <sup>1</sup>

(1) Muscle Health Research Centre, School of Kinesiology and Health Science, York University, Toronto, ON, and (2) Genetics and Genome Biology, The Research Institute, The Hospital for Sick Children, Toronto, ON, Canada

**Keywords:** mitochondrial myopathies, lysosomes, autophagy, mtDNA disease, human fibroblasts, therapeutic agent, mitochondrial health.

**To whom correspondence should be addressed:** David A. Hood, PhD  
Muscle Health Research Centre  
School of Kinesiology and Health Science  
York University, 4700 Keele St.,  
Toronto, ON, M3J 1P3, Canada  
Tel: (416) 736-2100 ext. 66640  
Email: [dhoo@yorku.ca](mailto:dhoo@yorku.ca)

## 26 Abstract

27 Maintaining mitochondrial function and dynamics is crucial for cellular health. In muscle, defects in  
 28 mitochondria result in severe myopathies where accumulation of damaged mitochondria causes  
 29 deterioration and dysfunction. Importantly, understanding the role of mitochondria in disease is a  
 30 necessity to determine future therapeutics. One of the most common myopathies is mitochondrial  
 31 encephalopathy lactic acidosis stroke-like episodes (MELAS), which has no current treatment. Recently,  
 32 MELAS patients treated with rapamycin exhibited improved clinical outcomes. However, the cellular  
 33 mechanisms of rapamycin effects in MELAS patients are currently unknown. In this study, we used  
 34 cultured skin fibroblasts as a window into the mitochondrial dysfunction evident in MELAS cells, as  
 35 well as to study the mechanisms of rapamycin action, compared to control, healthy individuals. We  
 36 observed that mitochondria from patients were fragmented, had a 3-fold decline in the average speed of  
 37 motility, a 2-fold reduced mitochondrial membrane potential and a 1.5–2-fold decline in basal  
 38 respiration. Despite the reduction in mitochondrial function, mitochondrial import protein Tim23 was  
 39 elevated in patient cell lines. MELAS fibroblasts had increased MnSOD, p62 and lysosomal function  
 40 when compared to healthy controls. Treatment of MELAS fibroblasts with rapamycin for 24 hrs resulted  
 41 in increased mitochondrial respiration compared to control cells, a higher lysosome content, and a  
 42 greater localization of mitochondria to lysosomes. Our studies suggest that rapamycin has the potential  
 43 to improve cellular health even in the presence of mtDNA defects, primarily via an increase in  
 44 lysosomal content.

45

46

## 47 **Introduction**

48 Rapamycin, an autophagy inducer and a pharmacological inhibitor of mammalian target of rapamycin  
 49 (mTOR), extends the lifespan of mice and delays the onset of age-associated diseases in model  
 50 organisms by rejuvenating cellular health (1). Treatment with rapamycin has ameliorated adverse  
 51 phenotypes and improved endurance exercise and mitochondrial function. The beneficial effects are due  
 52 to an increase in autophagic flux, an upregulation of lysosomal biogenesis, a higher abundance of  
 53 Lamp1 protein and the localization of TFEB, the master regulator of lysosomal biogenesis, to the  
 54 nucleus (2-4). Lysosomes play an integral role in maintaining mitochondrial health by degrading  
 55 damaged mitochondria in the process of mitophagy. Recent studies have suggested that mTOR has an  
 56 additional role in mitophagy(5), wherein global autophagy induction can trigger the activation of  
 57 mitophagic pathways in the presence of dysfunctional mitochondria (6, 7).

58 Mitochondrial myopathies are a group of neuromuscular disorders with prominent organelle  
 59 dysfunction due to genetic abnormalities. Symptoms exhibited by myopathy patients include muscle  
 60 weakness, exercise intolerance, mobility impairments, heart failure, stroke-like episodes, seizures,  
 61 deafness, blindness and dementia. Common mitochondrial myopathies include Kearns-Sayre syndrome  
 62 (KSS), myoclonus epilepsy with ragged-red fibers (MERRF), and mitochondrial encephalomyopathy  
 63 with lactic acidosis and stroke-like episodes (MELAS). MELAS is one of the most common maternally-  
 64 inherited mitochondrial disorder, with accumulations of point mutations in the mtDNA (8, 9) and a  
 65 prevalence rate estimated to be 6 per 10,000 people (10). As mitochondria are essential to nearly every  
 66 cell in the body, the disease affects the brain, heart, muscles, gastrointestinal tract, endocrine function,  
 67 pulmonary and renal systems (11, 12). Due to such a wide range of symptoms and genetic features,  
 68 conducting controlled clinical trials with therapeutic agents is challenging (12-16). No treatments have

been consistently associated with an improvement in clinical outcomes (14). Hence, the lack of a uniform treatment strategy provides a strong need for research in a potential therapeutic for MELAS.

Until recently, rapamycin was only widely used in genetic and mammalian models of disease. Currently however, multiple clinical trials are now underway to test the efficacy of rapamycin in various human diseases (17, 18). Treatment of patients with MELAS resulted in improved health progression, and rapamycin rescued some mitochondrial defects in isolated cultured fibroblasts (17). However, the cellular mechanisms of how rapamycin acts to improve cellular health in the presence of mtDNA defects are currently unknown. Thus, in this study we sought to investigate the extent of mitochondrial dysfunction in fibroblasts isolated from MELAS patients, as well as the effect of rapamycin treatment on mitochondria and lysosomes, since the function of these organelles is inextricably tied (19).

## Methods

*Cell culture*- Human skin fibroblasts from the forearm were obtained with informed consent from family members for diagnostic purposes, with approved methodologies established at the Hospital for Sick Children, Toronto, Canada. Cells cultures were established from 4 patients as well as 3 controls and were maintained as frozen stocks until used for analyses. The genetic mutation and patient demographics are reported in Table 1. The cells were thawed and grown at 5% CO<sub>2</sub> at 37° C in AMEM supplemented with 10% Fetal Bovine Serum and 1% Penicillin/ Streptomycin until they reached 80-90% confluency, as done previously (20, 21). Cells were treated with 100 nM rapamycin (Life Technologies, Burlington, ON, CA) or vehicle (DMSO) for 24hrs. To visualize mitochondria, fibroblasts were transfected with the plasmid mito-dsRED2, red fluorescent protein fused with the mitochondrial targeting sequence from cytochrome c oxidase subunit VIII (Clontech, Mountain View, CA) using Lipofectamine 2000 (Life Technologies, Burlington, ON, CA).

91 *Live cell imaging-* To visualize nuclei, mitochondria and lysosomes, fibroblasts were incubated with  
 92 Hoechst 33342 (ThermoFischer, MA, USA), 10 nM mitotracker green (Invitrogen, MA, USA) and 10  
 93 nM lysotracker red (Invitrogen, MA, USA) for 15 mins at 5% CO<sub>2</sub> at 37° C. Stained and mtDsRed  
 94 transfected cells were visualized using an inverted Nikon Eclipse TE-2000 confocal microscope  
 95 equipped with a ×60/1.5 oil objective lens and a custom-designed chamber for live cell imaging that  
 96 maintained a constant temperature of 37°C with 5% CO<sub>2</sub>. Live cell time lapse imaging of mitochondrial  
 97 dynamics was captured at 2 second intervals for a total time of 5 mins, as done previously (22).

98 *Analysis of mitochondrial motility and morphology-* Analyses were performed using NIS Element AR  
 99 3.1 software (Nikon Inc., USA). Mitochondrial motility was calculated by kymographs for each  
 100 fibroblast, using 7-11 cells per cell line. The average motility for each fibroblast is reported by the  
 101 measuring speed of 8-15 mitochondria per cell. Kymographs were generated from peripheral regions of  
 102 each cell as individual mitochondria could be resolved for analysis. Mitochondria in tubular networks,  
 103 often surrounding the nucleus, were not included for analysis. Velocity measurements were exported  
 104 from NIS software. Calculations of the percent fused and fragmented mitochondria were made using the  
 105 General Analysis program in NIS Elements where the minimum size of mitochondria was set at 0.2 μm.

106 *Lysosomal number and colocalization coefficient-* Both lysosomal and nuclear number were determined  
 107 from confocal images from each cell line (10/20x images) and analyzed in ImageJ (NIH, USA) via the  
 108 count tool. Lysosomal number was normalized to the number of nuclei. Pearson coefficient of  
 109 lysotracker red and mitotracker green stained fibroblasts was obtained from NIS Elements. For each cell  
 110 line, one coverslip was stained, and three images were taken at different locations of the coverslip. For  
 111 each image, the colocalization coefficient value was obtained (n=3 for each cell line). Vehicle-DMSO  
 112 and rapamycin treated cells were imaged on the same day.

113 *Lysosomal function*- To determine lysosomal function, fibroblasts were incubated with a fluorogenic  
 114 substrate for proteases, DQ Red BSA (Invitrogen, MA, USA). The dye conjugated to BSA is non-  
 115 fluorescent when the protein is in its native state. When cleaved by proteases in the lysosome, the  
 116 fluorescent quenching effect is relieved and single peptides emit red fluorescence. Fluorescence was  
 117 quantitated by flow cytometry, as described below.

118 *Flow Cytometry*- The fluorescent geomean intensities of mitotracker green, lysotracker red, DQ Red  
 119 BSA and JC-1 were determined using a BD FACSCaliber flow cytometer (BD Biosciences, CA, USA)  
 120 equipped with FL-1 (green), FL-2 (red) and FL-3 (deeper red) detectors.

121 *JC-1 Fluorescence*- Fibroblasts were grown to 80% confluency. Cells were washed with PBS and  
 122 incubated with 1.5  $\mu$ M of JC-1 at 37 °C in the dark for 30 mins. After incubation, cells were washed  
 123 with warm PBS and harvested. Pellets were resuspended in phenol red-free media and analyzed in the  
 124 flow cytometer.

125 *DCF Fluorescence*- Fibroblasts were seeded at 20,000 cells in a 96-well optical bottom plate. After 24  
 126 hrs, cells were incubated with 2'7' dichlorofluorescein diacetate (DCF) (Invitrogen, USA) at 37°C for 30  
 127 min. Fluorescence (excitation 480nm, emission 520 nm) was measured using a Synergy HT microplate  
 128 reader (BioTek Instruments, VT, USA). After incubation, cells were washed with PBS and incubated  
 129 with DAPI stain at 37°C for 15 min. Fluorescence was measured using the microplate reader and data  
 130 were normalized to DAPI staining per well.

131 *Mitochondrial Respiration*- Assays were performed using a Seahorse XF96 Cell Mito Stress Test Kit  
 132 (Agilent Biosciences, USA). Briefly, fibroblasts were seeded at a density of 20,000 cells per well in a  
 133 96-well Seahorse cell culture plate and incubated overnight. Each fibroblast cell line was seeded in 12  
 134 replicate wells. In experiments involving drug treatments, 6 wells per cell line were treated with DMSO

or rapamycin. After 24 h, the Seahorse XF96 Extracellular Flux Analyzer was used to measure the oxygen consumption rate (OCR) of each well. After the OCR was measured, the seeded plate was washed twice with PBS. Cell lysates were extracted from each well and Bradford reagent was added to measure protein absorbance per well. The assays were analyzed using XF Wave software and all OCR measurements were normalized to protein absorbance.

*Western blotting*- Cell protein extracts were prepared and separated in polyacrylamide SDS-PAGE gels. Proteins were then transferred onto nitrocellulose membranes and blocked in 5%-10% milk in TBS-T. Subsequently, membranes were incubated with the appropriate concentration of primary antibodies overnight at 4°C, and then with HRP-conjugated secondary anti-mouse (Cell Signaling 7076S) or anti-rabbit antibodies (Cell Signaling 7074S) for 1hr at room temperature. Membranes were then visualized with enhanced chemiluminescence using a Carestream Imaging system. Primary antibodies used were anti-Tim23 (BD Biosciences BD611222), anti- $\alpha$  smooth muscle Actin (Abcam ab5694), anti-p62 (Abcam ab56416), anti-B1/2 V-ATPase (SantaCruz SC-55544), anti-Kif5B (SantaCruz SC 28538), or anti-MnSOD (Upstate 06-984). All antibodies were diluted 1:1000. The blots were cut into four parts. The loading control was obtained from the same blot for all the antibodies. The p62 immunoblot was reprobed for V-ATPase and the Tim23 immunoblot was stripped and reprobed for MnSOD, which migrate at different molecular weights.

*Statistical analysis.* Data are presented as means  $\pm$  SD for all control and patient fibroblast lines. All statistical analysis was performed using GRAPHPAD PRISM version 9.00 for Windows (GraphPad Software, San Diego, CA, USA). Unpaired t-tests comparing average control to average patient were performed in Figures 1-3. In Figure 4, a paired t-test (denoted as #) was used for analysis when comparing vehicle vs rapamycin treatment of respective cell lines. An unpaired t-test, denoted as \*, was used for comparison of average vehicle vs average rapamycin treatment. In Figure 5, a one-way

ANOVA with a Tukey post-hoc test was performed for analyses. In all statistical analyses, a p-value < 0.05 was considered significant.

## Results

*Mitochondria are fragmented and motility is reduced in MELAS fibroblasts.* To assess the morphological integrity of mitochondria in fibroblasts isolated from healthy individuals and MELAS patients, cells were transfected with mtDsRed, a fluorescent mitochondrially-targeted protein, and visualized by confocal microscopy. A representative cell from control and MELAS fibroblast lines is shown in Figure 1A, illustrating the degree of mitochondrial network fragmentation in patient cells. A higher percent of fragmentation was observed in all three MELAS fibroblast lines when compared to the controls, with an average 1.5-fold increase in MELAS fibroblasts (Fig.1B). To determine whether this fragmentation had an impact on mitochondrial motility, 5-min time lapse videos were generated by live cell imaging of mtDsRed transfected cells. Motility was calculated by generating kymographs for each fibroblast. The average motility is reported by measuring the speed of 8-15 mitochondria for each fibroblast. All MELAS fibroblasts lines had reduced average (Fig. 1C) mitochondrial speed, with a reduction greater than 2-fold when compared to the control fibroblast lines. To assess whether this effect could be due to the expression of motor proteins responsible for organelle motility along microtubules, we measured the level of the kinesin motor protein isoform Kif5B by western blots in control and patient fibroblasts. A decline ( $p=0.05$ ) was observed in patient cell lines (Fig. 1D), which could contribute to this reduction in motility.

*MELAS fibroblasts exhibit reductions in mitochondrial membrane potential and respiration, but no change in mitochondrial content.* To verify changes in mitochondrial function in MELAS cells, we first determined the mitochondrial membrane potential of control and MELAS fibroblast lines. JC-1 is a fluorescent probe that remains in the cytosol as a monomer and emits green fluorescence when



181 mitochondria have lost their membrane potential. The dye aggregates within mitochondria to emit red  
 182 fluorescence where there is an intact membrane potential. Thus, the ratio of red to green fluorescence is  
 183 an indicator of mitochondrial health within the cell. MELAS fibroblast lines exhibited a significant  
 184 decline in the JC-1 ratio, indicating the loss of mitochondrial membrane potential in comparison to the  
 185 control cells (Fig. 2A). To assess mitochondrial respiration, we measured the oxygen consumption rate  
 186 (OCR) of our fibroblast lines using Seahorse. A typical OCR profile, along with the drug additions and  
 187 resulting data is shown in Fig. 2B. There was a significant decline in basal (Fig. 2C) and proton linked  
 188 (Fig. 2D) mitochondrial respiration in all MELAS cell lines. Maximal respiration, which is an indication  
 189 of total mitochondria in the cell, did not differ between control and MELAS cells (Fig. 2C). Patients  
 190 displayed a significantly increased Tim23 protein expression relative to controls (Fig 2E) suggesting a  
 191 compensatory adaptation in the import pathway, to correct for the mitochondrial dysfunction observed.

192 *MELAS fibroblasts have increased protease function and oxidative stress.* Lysosomes play an  
 193 integral part in maintaining cellular health by degrading dysfunctional organelles, like mitochondria. We  
 194 determined lysosomal content in fibroblasts using flow cytometry following incubation with the  
 195 fluorescent dye, lysotracker red. No differences were detected between control and MELAS fibroblast  
 196 cell lines (Fig. 3A). This corresponded to the lack of difference observed between control and patients in  
 197 the lysosomal protein marker B1/2 V-ATPase (Fig. 3C, D). Lysosomal function of live cells was also  
 198 assessed using the fluorescence intensity of a proteolytically cleaved fragment generated in the lysosome  
 199 (Fig. 3B). Despite individual differences, two out of the three MELAS cell lines exhibited clearly  
 200 elevated lysosomal protease function compared to control fibroblasts (Fig. 3B). In order to match this  
 201 with estimates of autophagy, p62 was used as a surrogate indicator of autophagy flux in these cells. The  
 202 content of p62 was elevated in the patients by about 30% ( $p < 0.05$ ; Fig. 3C, D), suggesting that while  
 203 lysosomal function was enhanced, uptake or delivery of autophagic substrates into the lysosome could

204 be impaired in patient cells. Since ROS can act as a signal for the activation of autophagy, we used DCF  
205 fluorescence as an indicator of ROS emission, and MnSOD protein as a measure of anti-oxidant capacity  
206 in these cells. Our data indicate that these patient cells exhibited a marked 7-8-fold increase ( $P<0.05$ ;  
207 Fig. 3E) in DCF fluorescence compared to controls, an increase similar to previous reports (21), which  
208 was only accompanied by a 2-fold higher level ( $P<0.05$ ; Fig. 3D) of MnSOD protein.

209 *Rapamycin rescues basal and proton leak mitochondrial respiration in MELAS fibroblasts.* We then  
210 assessed mitochondrial function following treatment of the cells with rapamycin for 24 hours. Upon  
211 addition of rapamycin, control fibroblasts displayed 2-9-fold increases in DCF fluorescence. However,  
212 DCF fluorescence in MELAS fibroblasts did not increase in response to rapamycin (Fig. 3F). In  
213 addition, while rapamycin treatment had very little effect on OCR parameters measured in control cells,  
214 apart from a minor reduction in basal respiration (Fig. 4A, B), rapamycin treatment significantly  
215 improved the respiratory function of MELAS fibroblasts, by increasing basal (60%,  $P<0.05$ ), as well as  
216 proton leak (100%,  $P<0.05$ ; Fig. 4C,D) respiration.

217 *The beneficial effect of rapamycin on mitochondria could be mediated by increased lysosomal number.*  
218 It has been known for some time that rapamycin treatment leads to an elevation in lysosome content (2-  
219 4). To evaluate this in patient and control cells, we stained fibroblasts with lysosomal and nuclear  
220 markers (Fig. 5A). We observed that rapamycin induced a 4-5-fold increase ( $P<0.05$ ) in lysosomal  
221 number in both control and patient cells when compared to vehicle treatment (Figs. 5B). Rapamycin had  
222 no significant effect on lysosomal function in either control or patient cell lines (Fig. 5C). Our data also  
223 show that, upon rapamycin treatment, lysosomes colocalize to a much greater extent with mitochondria  
224 in MELAS fibroblasts (Fig. 5D). This increase in colocalization was not evident in control cells. These  
225 data suggest that the rapamycin-induced increase in lysosome content may help traffic dysfunctional  
226 mitochondria to the organelle for clearance. This would serve to reduce the pool of dysfunctional

227 organelles and improve mitochondrial function in MELAS patient cells, as evident from better  
228 respiratory rates and a lack of increase in ROS emission, when treated with the drug.

229

## 230 Discussion

231 Mitochondrial defects can cause severe energy deficits and cell death. To preserve health, the  
 232 maintenance of mitochondrial integrity and function is critical. Potential therapeutic strategies for  
 233 mitochondrial disorders are being investigated, however there is currently no effective intervention.  
 234 Rapamycin has shown benefits for muscle myopathies (2, 17, 23) but the mechanism of action is not  
 235 fully known. Our data suggest that as an autophagy inducer, rapamycin may improve mitochondrial  
 236 dysfunction, since we observed that mitochondrial respiration in MELAS cells was, in part, rescued by  
 237 rapamycin treatment.

238 Mitochondrial dysfunction is a common feature of mitochondrial myopathies such as MELAS  
 239 (23-25). We observed a ~50% reduction in membrane potential in patient cells, similar to other reported  
 240 literature in MELAS fibroblasts (23). Along with lower mitochondrial membrane potential,  
 241 mitochondrial respiration was reduced with no detectable changes in mitochondrial content (26).  
 242 Another recent study (27) has reported no changes in ATP production in MELAS fibroblasts. Similarly,  
 243 we detected no differences in ATP-linked respiration in our cell lines. An indirect measure of  
 244 mitochondrial content in a cell is maximal respiratory capacity, which is not different between our  
 245 control and patient fibroblasts. Studies have generally reported no changes in total mitochondrial mass  
 246 in MELAS fibroblasts (21, 26) and have observed an upregulation of mitochondrial import machinery  
 247 (20). We noted an increase in Tim23, a mitochondrial protein encoded by the nuclear genome, similar to  
 248 previous studies in mtDNA disease patients (20). Higher levels of Tim23 might be an indication of a  
 249 compensatory retrograde signaling pathway activated in the presence of mitochondrial dysfunction. In  
 250 the analysis of multiple MELAS patients, individual differences in pathophysiology have been observed,  
 251 whereby some patients exhibit an extreme phenotype of reduced mitochondrial potential, respiration and  
 252 mitochondrial proteins, whereas others have less drastic changes, with no differences detected (23). This

is likely due to variability in patient symptoms, age of onset and manifestations, and this could clearly account for some of the variability observed between patient cells in the current study. Other limitations that could have introduced variability among patient and control cells include different passage numbers, as well as cell proliferation rates.

Mitochondrial motility is necessary to maintain a healthy pool of the organelle. Cytoskeletal and motor proteins allow for the transport of mitochondria to diverse cellular regions in an effort to maintain reticular, network-like structures. We have previously shown that situations of high oxidative stress led to mitochondria becoming stationery and fragmented (22). Reduced mitochondrial motility has been reported in a variety of metabolic, neurodegenerative and mitochondrial diseases (28). Our data indicate that MELAS fibroblasts exhibit fragmented mitochondria, as reported by others (23), and have a reduced average motility. This is likely due in part to lower levels of the kinesin isoform Kif5B, as well as elevated antioxidant enzymes, suggestive of increased oxidative stress. Fragmented, dysfunctional mitochondria are ideal substrates for the mitophagy pathway, leading to their subsequent degradation within lysosomes.

Earlier studies using electron microscopy and flow cytometry have documented an increase in lysosomal number in MELAS cells (26). More recently, investigations have identified the localization of mitochondria to autophagosomes, suggesting mitochondrial degradation (23). While we did not observe an increase in lysosomal content, either visualized using lysotracker staining, or a well-established marker of lysosome content, B1/2 V-ATPase, our data do indicate that protease function within lysosomes was elevated in MELAS fibroblasts. This would suggest an enhanced capacity for cargo degradation in MELAS cells. However, p62 levels were increased in the patients, and this is most often interpreted as an indicator of reduced autophagy flux. This diminished autophagy is supported by the

275 literature which shows that patient cells have elevated levels of autophagy markers such as ATG12-  
276 ATG5 and LC3, as well as an accumulation of autophagosomes (23, 24).

277 The mammalian target of rapamycin mTOR has a well-established role in regulating autophagy.  
278 This may also extend to mitophagy (5). The activation of autophagy using rapamycin-induced mTOR  
279 inhibition can trigger the activation of mitophagic pathways when there are dysfunctional mitochondria,  
280 in a dose- and duration-dependent manner (6, 7). Chronic treatment with rapamycin improved disease  
281 phenotype of cells from patients with Leber's hereditary optic neuropathy (LHON), a mitochondrial  
282 disorder. Rapamycin treatment induced autophagy as detected by autophagosome and mitochondrial  
283 specific markers co-localization. Furthermore, the threshold of pathogenic mtDNA mutations decreased,  
284 suggesting that mitophagy selectively degraded dysfunctional mitochondria (6). We observed a similar  
285 increase in lysosomal number in control and patient cell lines with rapamycin treatment. However, in  
286 patient cells, lysosomes appeared to be larger in size, had increased staining intensity, and the index of  
287 colocalization with mitochondria was significantly elevated in patient cells as a result of rapamycin  
288 treatment. This increased colocalization may have resulted in mitochondrial repair, as we observed an  
289 increase in organelle function upon rapamycin treatment, but only in patient fibroblasts. This was  
290 evident from some improvements in mitochondrial respiration. In addition, notwithstanding the  
291 limitations of using DCF as an indicator of ROS (17), the lack of increase in DCF fluorescence in  
292 response to rapamycin suggests the induction of a more efficient electron transport chain (29) and a  
293 healthier antioxidant status within the MELAS cells (30).

294 In addition to studies involving cells in culture, the benefits of rapamycin treatment have been  
295 observed in *ex vivo* and *in vivo* models. In mice exhibiting extreme myopathy, rapamycin treatment  
296 improved the adverse phenotype. Treated mice exhibited a reversal of mitochondrial structural  
297 abnormalities, mitochondrial dysfunction and an improvement in muscle function. Rapamycin increased

298 autophagic flux in mice and induced TFEB translocation to the nucleus, which results in lysosomal  
299 biogenesis (2). In a recent clinical trial, MELAS patients who were switched to rapamycin treatment  
300 exhibited improved metabolic function with less oxidative stress. Furthermore, rapamycin activated  
301 autophagy and attenuated the decline in mitochondrial membrane potential and fragmentation of  
302 mitochondria (17).

303         The patients' cells in the current study have the same mitochondrial content as control cells, but  
304 possess mitochondria that are fragmented and poorly motile, with indices of reduced membrane  
305 potential, higher ROS emission which outstrips antioxidant capacity, and lower basal respiration. These  
306 mitochondria should be recycled and removed to enhance the quality of the organelle pool. Clearance  
307 would be achieved with an enhanced rate of mitophagy directed to the lysosome. In MELAS patients,  
308 lysosome number is similar as in control cells, but these lysosomes have modestly enhanced lysosome  
309 proteolytic function, which seems insufficient to reduce mitochondrial dysfunction. In addition, the lack  
310 of mitochondrial motility, perhaps as a result of reduced cytoskeletal transport and enhanced oxidative  
311 stress (22), impairs mitochondrial trafficking to the lysosome. Evidence for impaired delivery is found  
312 in the increased level of p62, an autophagy substrate. Attainment of a healthier mitochondrial pool could  
313 be achieved by providing the cell with a greater number of lysosomes, thereby reducing the traffic jam.  
314 Rapamycin treatment clearly increased lysosome content, providing a significantly improved destination  
315 for the removal of impaired mitochondria, evident by the co-localization index. This greater lysosomal  
316 degradation of dysfunctional mitochondria likely contributes to the better respiration rates back toward  
317 healthy control cells, an enhancement that might be amplified with a longer rapamycin treatment time.  
318 We speculate (Fig. 6) that the maintenance of a constant mitochondrial content between patient and  
319 control cells also obligates a higher degree of retrograde signaling in the presence of rapamycin from  
320 mitochondria to the nucleus in patient cells, directing gene expression toward enhanced biogenesis in the

face of increased mitochondrial degradation in lysosomes. This is evident in non-treated cells by the higher expression of Tim23, and has been documented previously (20) in MELAS cells. Thus, in summary, our pre-clinical data suggest that rapamycin may have some benefits for MELAS patients with the potential to rescue mitochondrial deficits, primarily via enhanced lysosomal content.

## Acknowledgments

This research was funded by NSERC Canada. David A. Hood is the holder of a Canada Research Chair in Cell Physiology.

**Table 1. Age, sex and mutation identified from forearm samples in four MELAS patients.**

|    | Patient ID Number | Age       | Sex | Mutation | Heteroplasmy |
|----|-------------------|-----------|-----|----------|--------------|
| P1 | 5509              | 6 months  | M   | G13513A  | 70%          |
| P2 | 13801             | >18 years | F   | T8993C   | 72 or 82%    |
| P3 | 21124             | 2 years   | F   | T8993C   | >95%         |
| P4 | 20551             | 2 years   | F   | G13513A  | unknown      |



## 336 **Figure Legends**

337 **Figure 1.** Mitochondrial motility and morphology in fibroblasts isolated from human control individuals  
 338 and MELAS patients. A) Mitochondrial network visualized by mtDsRed in control and patient  
 339 representative fibroblast. Live cell imaging was performed with a confocal microscope equipped with a  
 340 heated stage and CO<sub>2</sub> chamber. B) Percent of fragmented mitochondria in cells from each cell line,  
 341 control and patient (n=7-12 cells per cell line for control and patient). All cell lines were included in the  
 342 average control (Cont) and patient (Pat). Average percent of fragmentation is shown for all  
 343 control/patient cell line. Control represented by black bar and patient cell lines by grey bar. Motility of  
 344 mitochondria was measured via kymographs to determine (C) average speed. Kymographs were  
 345 generated from time lapse videos of 2 sec intervals for 5mins duration. N= 6-12 cells per cell line and 8-  
 346 15 mitochondria per cell. The average control had n=24 and average patient n=21 cells. D) Kif-5B  
 347 protein level in three control and three patient cell lines. Unpaired t-test was performed where \* p-value  
 348 < 0.05 and \*\*\* p-value is <0.0001.

349 **Figure 2.** Mitochondrial function and amount in healthy and MELAS fibroblasts. A) Mitochondrial  
 350 membrane potential as measured by fluorescent probe JC-1. Aggregated form of JC-1 emits a red  
 351 fluorescence in mitochondria with an intact membrane potential whereas a monomer JC-1 fluoresces  
 352 green when present in the cytosol. Fluorescent intensities were measured in the flow cytometer for  
 353 control (Cont) and patient (Pat). B) A diagram of an annotated seahorse XF Analyzer graph with  
 354 different measured parameters labeled for Mitostress assay C) Average basal, spare respiratory capacity  
 355 and maximal respiration in three control and three MELAS fibroblast cell lines, n=7. D) Average Proton  
 356 leak dependant respiration and ATP Production in three control and three MELAS fibroblast cell lines,  
 357 n=7. E) Tim23 levels three control and three patient cell lines. Smooth muscle actin,  $\alpha$ -SMA, used as

loading control. Unpaired t-test was performed where \* p-value < 0.05, \*\* p-value < 0.01 and \*\*\* p-value is <0.0001.

**Figure 3.** Lysosomal function and oxidative stress in healthy and MELAS fibroblasts. A) Fluorescent intensity for lysotracker red and B) lysosomal function via DQ Red BSA in control and patient fibroblasts, n=7. All cell lines were included in the average control (Cont) and patient (Pat). No significance (n.s) when comparing lysosomal function between average control and patient fibroblasts. C) B1/2 v-ATPase, p62, MnSOD protein expression in three control and three patient cell lines. Smooth muscle actin,  $\alpha$ -SMA, used as loading control. D) Normalized protein expression in control and patient cell lines (n=3). E) ROS measured with DCF fluorescent probe in control and patients. F) Fold change of ROS levels upon rapamycin treatment. n=5 for each cell line treated with DMSO or rapamycin. Unpaired t-test was performed where \* p-value < 0.05 and \*\*\* p-value is <0.0001 patient vs control.

**Figure 4.** Rapamycin effects mitochondrial respiration in fibroblasts. A-B) Average basal respiration, spare respiratory capacity, proton leak and ATP production for all control fibroblast lines with and without rapamycin treatment. C-D) Basal, spare respiratory capacity, proton leak and ATP production for all MELAS lines with and without rapamycin, n= 4-6 for each cell line treated with DMSO or rapamycin. All cell lines were included in the average control (C - / + rapamycin) or patient (P - / + rapamycin) for a n=11. Paired t-test was performed where # p-value < 0.05 rapamycin treatment (+rapa) vs vehicle-DMSO treatment (-rapa) of respective cell line. Unpaired t-test was performed where \* p-value < 0.05 and \*\* p-value <0.01 of average vehicle vs average rapamycin treatment.

**Figure 5.** Rapamycin effect mediated through lysosomal alterations. A) Representative confocal image of hoechst (H), mitotracker green (MTG) and lysotracker red (LTR) staining from one control and patient treated with DMSO or rapamycin. B) Quantification of lysosomal number from DMSO and rapamycin treatment in control and patient cell lines (n=3). Rapamycin treatment increased lysosomal

number per nucleus in control fibroblast lines. C) Rapamycin effect on lysosomal function in control and MELAS fibroblast lines, n=7. All cell lines were included in the average control (Cont) and patient (Pat). D) LTR signal colocalizes with MTG with a higher colocalization coefficient in MELAS lines treated with rapamycin. Images were taken from different locations on a coverslip, n=3 images for each cell lines. 1-way ANOVA was performed where \* p-value < 0.05 of average rapamycin treated vs average vehicle-DMSO treatment.

**Figure 6.** Illustration of the maintenance of mitochondrial health in control and patients with mtDNA mutations. In comparison to healthy controls, mtDNA patients exhibit a similar total mitochondrial content, but these organelles are fragmented with elevated ROS emission, lower membrane potential and basal respiration, and poor cellular motility. To compensate for loss of mitochondrial function, patients have an increased mitochondrial retrograde signaling the nucleus, altering gene expression, as shown previously (20). Lysosome content is similar in control and patient cells, and the addition of rapamycin increases lysosomes in both cell types equally. This effect improves mitochondrial quality in patient cells, promoting mitophagy as evident from greater colocalization of lysosomes and mitochondria, and improved organelle function.

## References

1. **Kennedy BK, and Lamming DW.** The Mechanistic Target of Rapamycin: The Grand Conductor of Metabolism and Aging. *Cell Metabolism* 23: 990-1003, 2016.
2. **Civiletto G, Dogan SA, Cerutti R, Fagioli G, Moggio M, Lamperti C, Benincà C, Viscomi C, and Zeviani M.** Rapamycin rescues mitochondrial myopathy via coordinated activation of autophagy and lysosomal biogenesis. *EMBO Molecular Medicine* 10: e8799, 2018.
3. **Sato M, Seki T, Konno A, Hirai H, Kurauchi Y, Hisatsune A, and Katsuki H.** Rapamycin activates mammalian microautophagy. *Journal of Pharmacological Sciences* 140: 201-204, 2019.
4. **Zhang X, Chen W, Gao Q, Yang J, Yan X, Zhao H, Su L, Yang M, Gao C, Yao Y, Inoki K, Li D, Shao R, Wang S, Sahoo N, Kudo F, Eguchi T, Ruan B, and Xu H.** Rapamycin directly activates lysosomal mucolipin TRP channels independent of mTOR. *PLoS Biology* 17: e3000252, 2019.
5. **Bartolomé A, García-Aguilar A, Asahara S-I, Kido Y, Guillén C, Pajvani UB, and Benito M.** mTORC1 Regulates both General Autophagy and Mitophagy Induction after Oxidative Phosphorylation Uncoupling. *Molecular and Cellular Biology* 37: e00441-00417, 2017.
6. **Dai Y, Zheng K, Clark J, Swerdlow RH, Pulst SM, Sutton JP, Shinobu LA, and Simon DK.** Rapamycin drives selection against a pathogenic heteroplasmic mitochondrial DNA mutation. *Human Molecular Genetics* 23: 637-647, 2014.
7. **Gilkerson RW, De vries RLA, Lebot P, Wikstrom JD, Torgyeke E, Shirihai OS, Przedborski S, and Schon EA.** Mitochondrial autophagy in cells with mtDNA mutations results from synergistic loss of transmembrane potential and mTORC1 inhibition. *Human Molecular Genetics* 21: 978-990, 2012.
8. **Connolly BS, Feigenbaum ASJ, Robinson BH, Dipchand AI, Simon DK, and Tarnopolsky MA.** MELAS syndrome, cardiomyopathy, rhabdomyolysis, and autism associated with the A3260G mitochondrial DNA mutation. *Biochemical and Biophysical Research Communications* 402: 443-447, 2010.
9. **Flierl A, Reichmann H, and Seibel P.** Pathophysiology of the MELAS 3243 transition mutation. *Journal of Biological Chemistry* 272: 27189-27196, 1997.
10. **Sproule DM, and Kaufmann P.** Mitochondrial encephalopathy, lactic acidosis, and stroke-like episodes: Basic concepts, clinical phenotype, and therapeutic management of MELAS syndrome. *Annals of the New York Academy of Sciences* 1142: 133-158, 2008.
11. **Barca E, Cooley V, Schoenaker R, Emmanuele V, DiMauro S, Cohen B, Karaa A, Vladutiu G, Haas R, Haas R, Van Hove J, Scaglia F, Parikh S, Bedoyan J, DeBrosse S, Gavriloiva R, Saneto R, Enns G, Stacpoole P, Ganesh J, Larson A, Zolkipli-Cunningham Z, Falk M, Goldstein A, Tarnopolsky M, Camp K, Krotoski D, Engelstad K, Rosales X, Kriger J, Buchsbaum R, Thompson J, and Hirano M.** Mitochondrial disease phenotypes of 999 patients in the North American Mitochondrial Disease Consortium (NAMDC) (P1.141). *Neurology* 90: P1.141, 2018.
12. **El-Hattab AW, Adesina AM, Jones J, and Scaglia F.** MELAS syndrome: Clinical manifestations, pathogenesis, and treatment options. *Molecular Genetics and Metabolism* 116: 4-12, 2015.
13. **Berbel-Garcia A, Barbera-Farre JR, Porta Etessam JP, Martinez Salio A, Cabello A, Gutierrez-Rivas E, and Campos Y.** Coenzyme Q 10 improves lactic acidosis, stroke-like episodes, and epilepsy in a patient with MELAS (mitochondrial myopathy, encephalopathy, lactic acidosis, and stroke-like episodes). *Clinical Neuropharmacology* 27: 187-191, 2004.
14. **Paik K, Lines MA, Chakraborty P, Khangura SD, Latocki M, Al-Hertani W, Brunel-Guitton C, Khan A, Penny B, Rockman-Greenberg C, Rupa CA, Sondheimer N, Tarnopolsky M, Tingley K, Coyle D, Dyack S, Feigenbaum A, Geraghty MT, Gillis J, Van Karnebeek CDM,**

- 444 **Kronick JB, Little J, Potter M, Siriwardena K, Sparkes R, Turner LA, Wilson K, Buhas D, and**  
445 **Potter BK.** Health Care for Mitochondrial Disorders in Canada: A Survey of Physicians. *Canadian*  
446 *Journal of Neurological Sciences* 46: 717-726, 2019.
- 447 15. **Rodriguez MC, MacDonald JR, Mahoney DJ, Parise G, Beal MF, and Tarnopolsky MA.**  
448 Beneficial effects of creatine, CoQ10, and lipoic acid in mitochondrial disorders. *Muscle and Nerve* 35:  
449 235-242, 2007.
- 450 16. **Steriade C, Andrade DM, Faghfoury H, Tarnopolsky MA, and Tai P.** Mitochondrial  
451 encephalopathy with lactic acidosis and stroke-like episodes (MELAS) may respond to adjunctive  
452 ketogenic diet. *Pediatric Neurology* 50: 498-502, 2014.
- 453 17. **Johnson SC, Martinez F, Bitto A, Gonzalez B, Tazaerslan C, Cohen C, Delaval L, Timsit J,**  
454 **Knebelmann B, Terzi F, Mahal T, Zhu Y, Morgan PG, Sedensky MM, Kaeberlein M, Legendre C,**  
455 **Suh Y, and Canaud G.** mTOR inhibitors may benefit kidney transplant recipients with mitochondrial  
456 diseases. *Kidney International* 95: 455-466, 2019.
- 457 18. **McAlary L, Plotkin SS, and Cashman NR.** Emerging Developments in Targeting  
458 Proteotoxicity in Neurodegenerative Diseases. *CNS Drugs* 33: 883-904, 2019.
- 459 19. **Demers-Lamarche J, Guillebaud G, Tlili M, Todkar K, Bélanger N, Grondin M, P'Nguyen**  
460 **A, Michel J, and Germain M.** Loss of mitochondrial function impairs Lysosomes\*. *Journal of*  
461 *Biological Chemistry* 291: 10263-10276, 2016.
- 462 20. **Joseph AM, Rungi AA, Robinson BH, and Hood DA.** Compensatory responses of protein  
463 import and transcription factor expression in mitochondrial DNA defects. *American Journal of*  
464 *Physiology - Cell Physiology* 286: C867-875, 2004.
- 465 21. **Menzies KJ, Robinson BH, and Hood DA.** Effect of thyroid hormone on mitochondrial  
466 properties and oxidative stress in cells from patients with mtDNA defects. *American Journal of*  
467 *Physiology - Cell Physiology* 296: C355-362, 2009.
- 468 22. **Iqbal S, and Hood DA.** Oxidative stress-induced mitochondrial fragmentation and movement in  
469 skeletal muscle myoblasts. *American Journal of Physiology - Cell Physiology* 306: C1176-1183, 2014.
- 470 23. **Garrido-Maraver J, Paz MV, Cordero MD, Bautista-Lorite J, Oropesa-Ávila M, de la**  
471 **Mata M, Pavón AD, de Laveria I, Alcocer-Gómez E, Galán F, Ybot González P, Cotán D, Jackson**  
472 **S, and Sánchez-Alcázar JA.** Critical role of AMP-activated protein kinase in the balance between  
473 mitophagy and mitochondrial biogenesis in MELAS disease. *Biochimica et Biophysica Acta - Molecular*  
474 *Basis of Disease* 1852: 2535-2553, 2015.
- 475 24. **Cotán D, Cordero MD, Garrido-Maraver J, Oropesa-Avila M, Rodríguez-Hernández Á,**  
476 **Izquierdo LG, Mata MDI, Miguel MD, Lorite JB, Infante ER, Jackson S, Navas P, and Sánchez-**  
477 **Alcázar JA.** Secondary coenzyme Q 10 deficiency triggers mitochondria degradation by mitophagy in  
478 MELAS fibroblasts. *The FASEB Journal* 25: 2669-2687, 2011.
- 479 25. **Morán M, Delmiro A, Blázquez A, Ugalde C, Arenas J, and Martín MA.** Bulk autophagy,  
480 but not mitophagy, is increased in cellular model of mitochondrial disease. *Biochimica et Biophysica*  
481 *Acta - Molecular Basis of Disease* 1842: 1059-1070, 2014.
- 482 26. **James AM, Wei YH, Pang CY, and Murphy MP.** Altered mitochondrial function in  
483 fibroblasts containing MELAS or MERRF mitochondrial DNA mutations. *Biochemical Journal* 318:  
484 401-407, 1996.
- 485 27. **Tokuyama T, Hirai A, Shiiba I, Ito N, Matsuno K, Takeda K, Saito K, Mii K, Matsushita**  
486 **N, Fukuda T, Inatome R, and Yanagi S.** Mitochondrial dynamics regulation in skin fibroblasts from  
487 mitochondrial disease patients. *Biomolecules* 10: 0, 2020.

- 488 28. **Suárez-Rivero J, Villanueva-Paz M, de la Cruz-Ojeda P, de la Mata M, Cotán D, Oropesa-**  
489 **Ávila M, de Laveria I, Álvarez-Córdoba M, Luzón-Hidalgo R, and Sánchez-Alcázar J.**  
490 Mitochondrial Dynamics in Mitochondrial Diseases. *Diseases* 5: 1, 2016.
- 491 29. **Villa-Cuesta E, Holmbeck MA, and Rand DM.** Rapamycin increases mitochondrial efficiency  
492 by mtDNAdependent reprogramming of mitochondrial metabolism in Drosophila. *Journal of Cell*  
493 *Science* 127: 2282-2290, 2014.
- 494 30. **Shin YJ, Cho DY, Chung TY, Han SB, Hyon JY, and Wee WR.** Rapamycin reduces reactive  
495 oxygen species in cultured human corneal endothelial cells. *Current Eye Research* 36: 1116-1122, 2011.
- 496

**Table 1. Age, sex and mutation identified from forearm samples in four MELAS patients.**

|    | <b>Patient ID<br/>Number</b> | <b>Age</b> | <b>Sex</b> | <b>Mutation</b> | <b>Heteroplasmy</b> |
|----|------------------------------|------------|------------|-----------------|---------------------|
| P1 | 5509                         | 6 months   | M          | G13513A         | 70%                 |
| P2 | 13801                        | >18 years  | F          | T8993C          | 72 or 82%           |
| P3 | 21124                        | 2 years    | F          | T8993C          | >95%                |
| P4 | 20551                        | 2 years    | F          | G13513A         | unknown             |

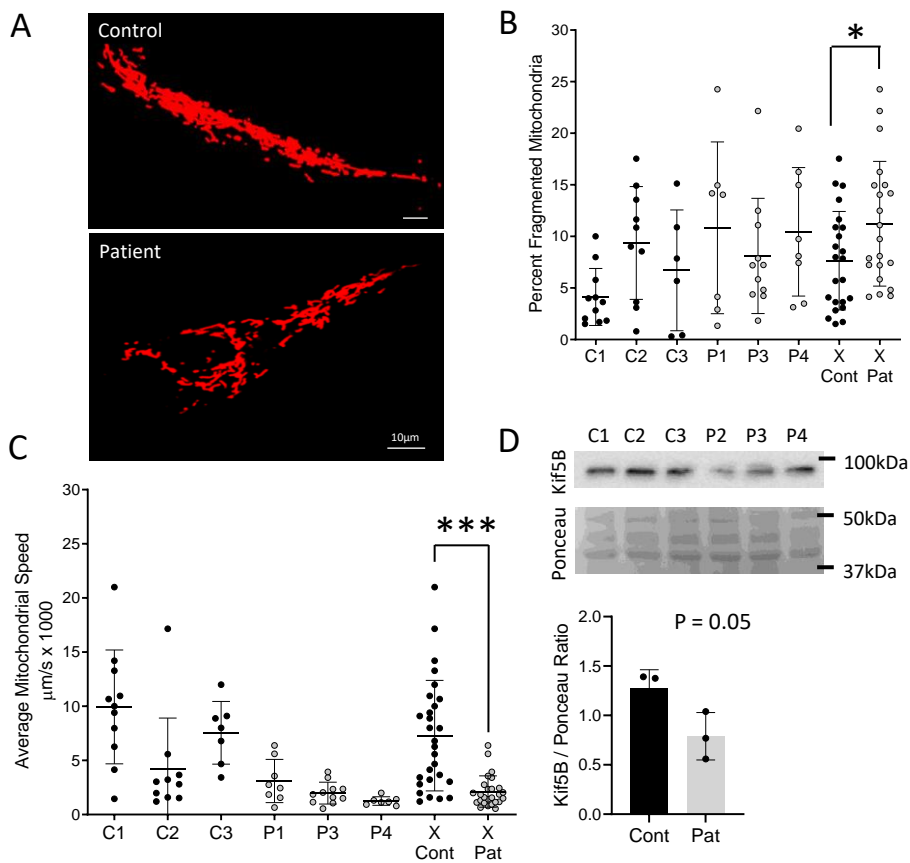



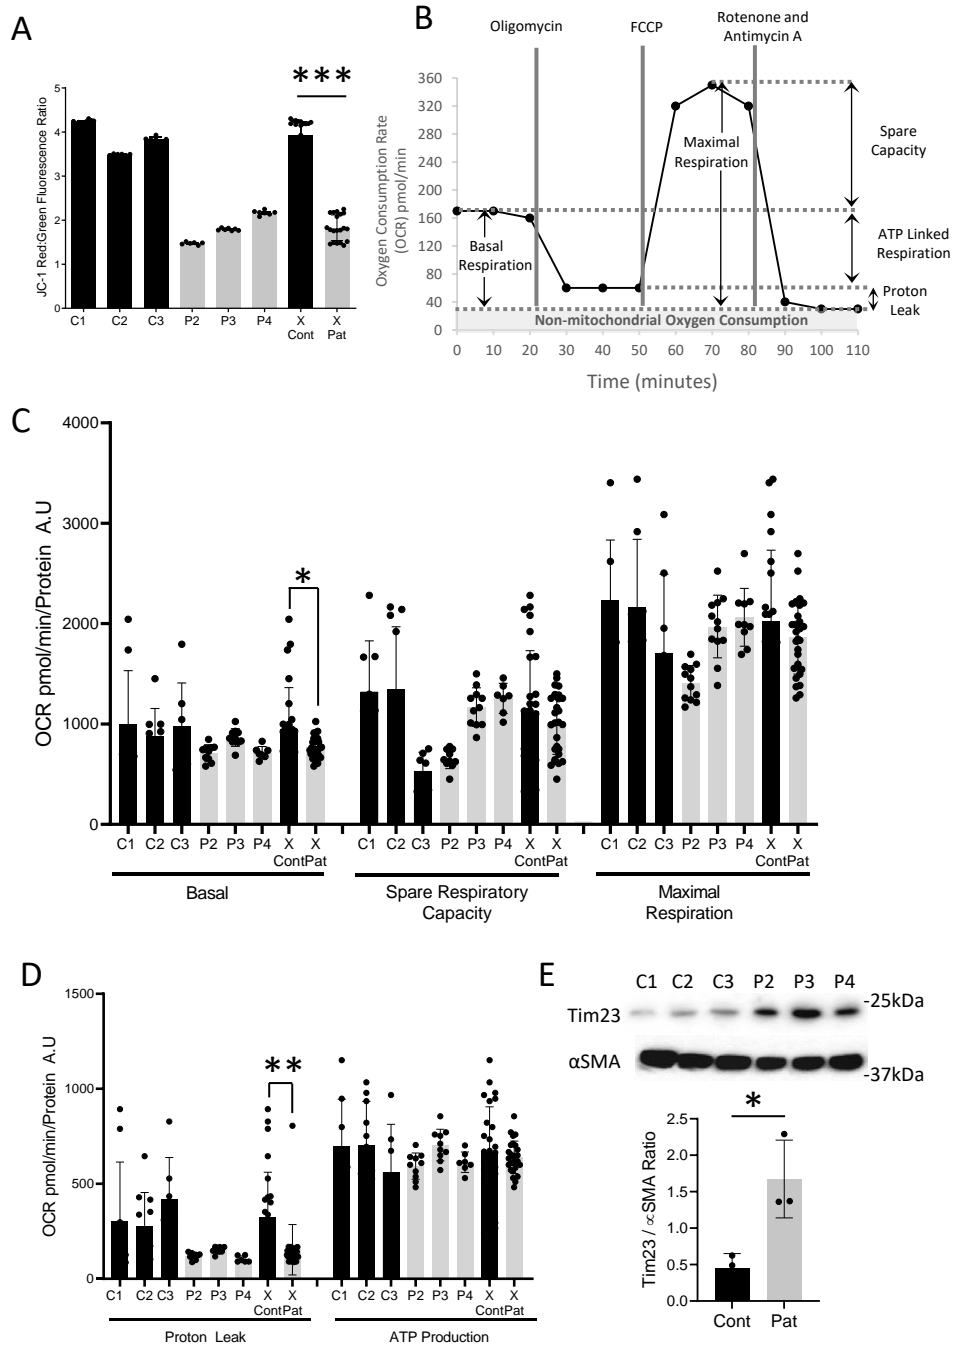

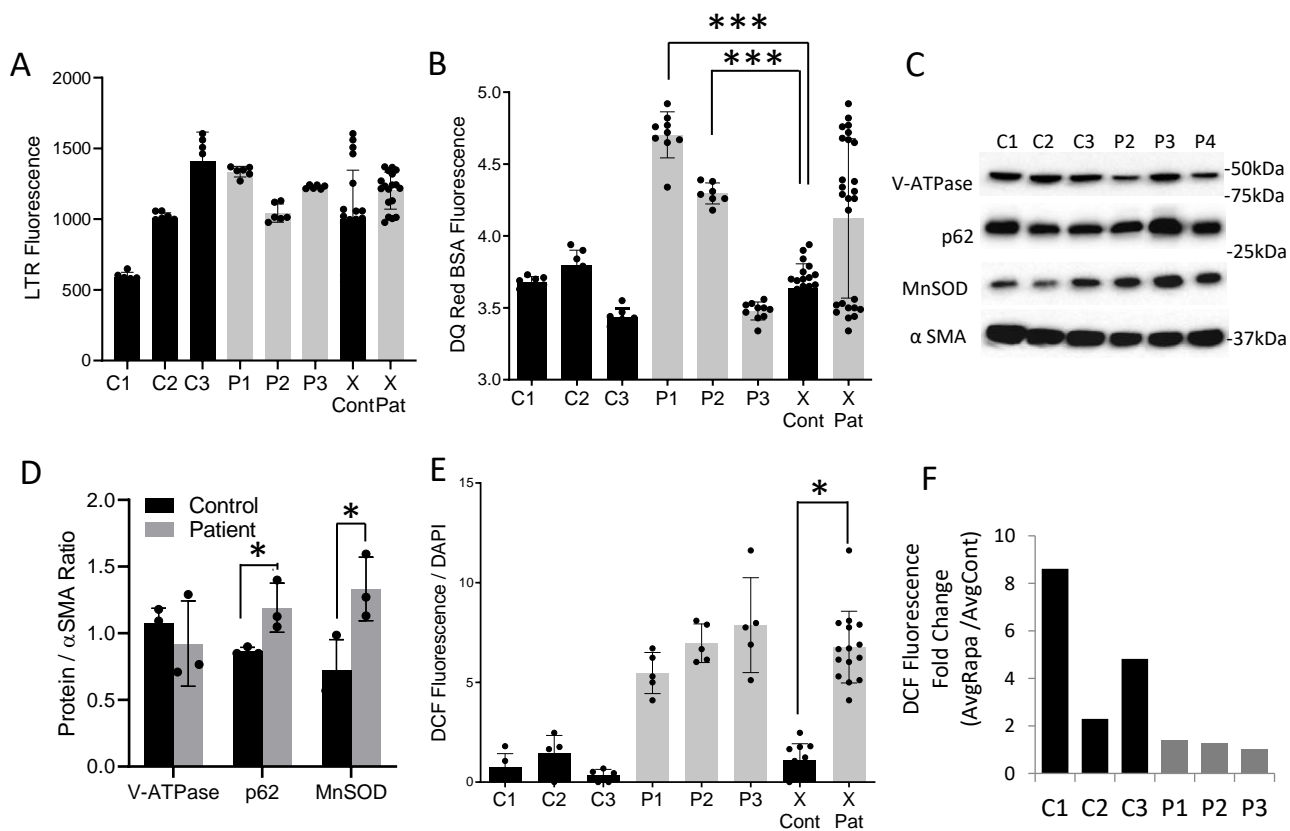

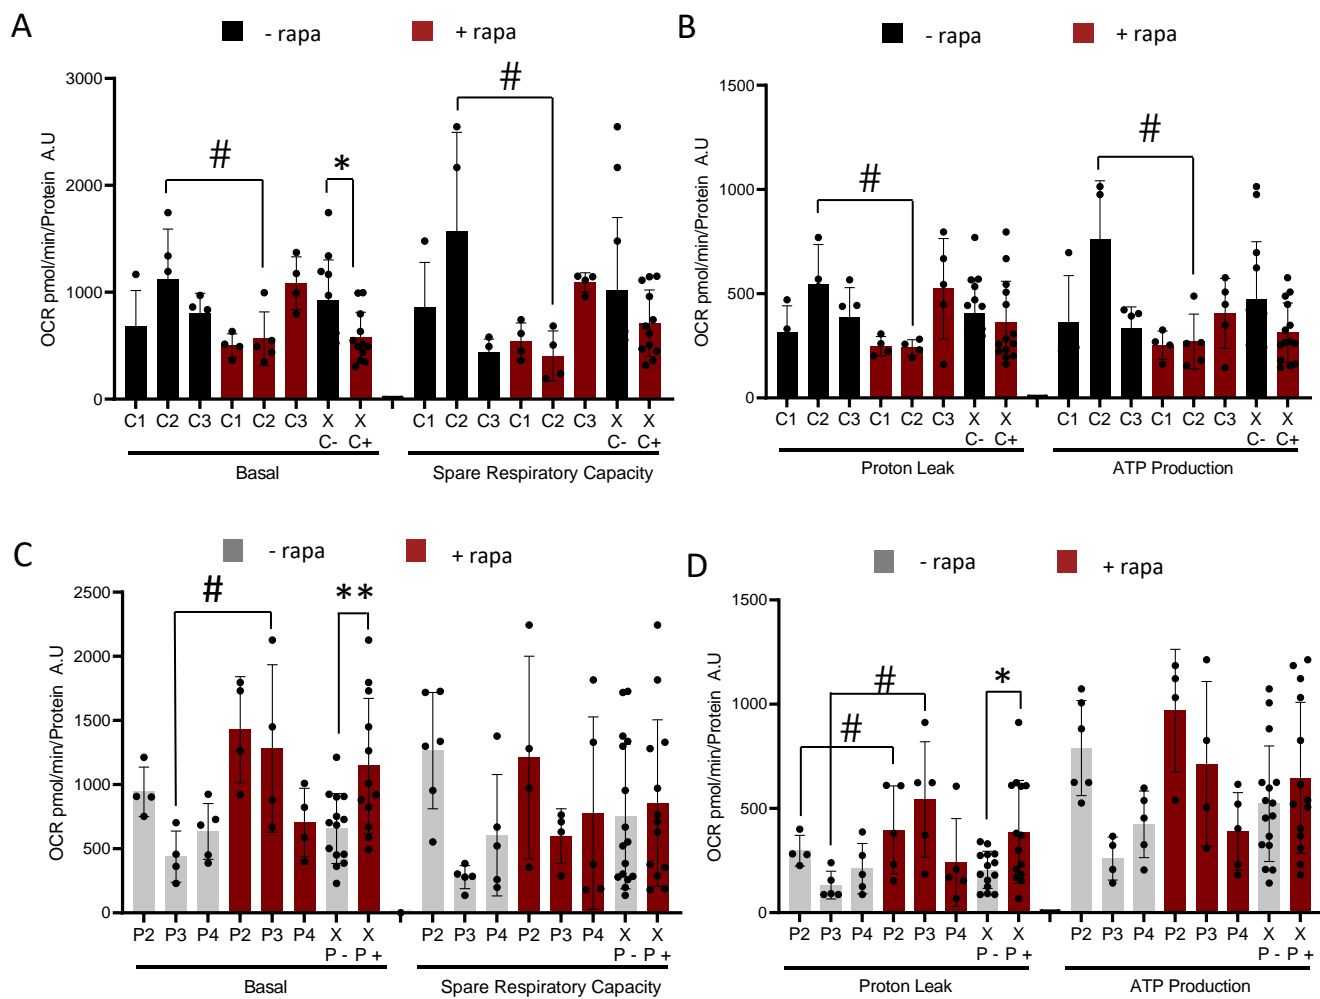

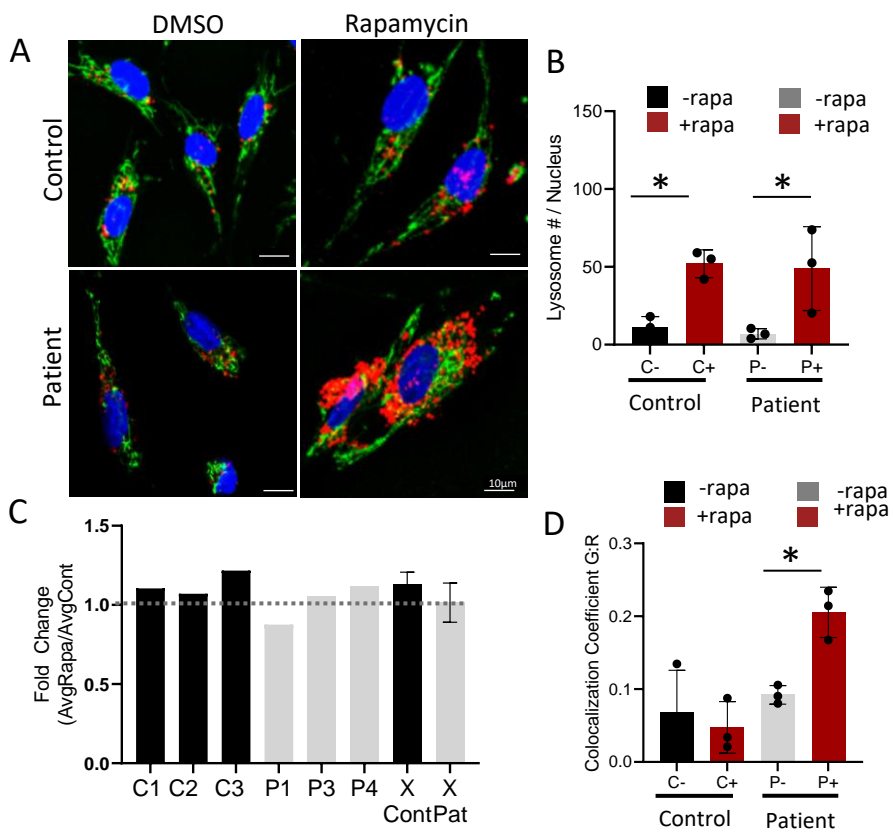

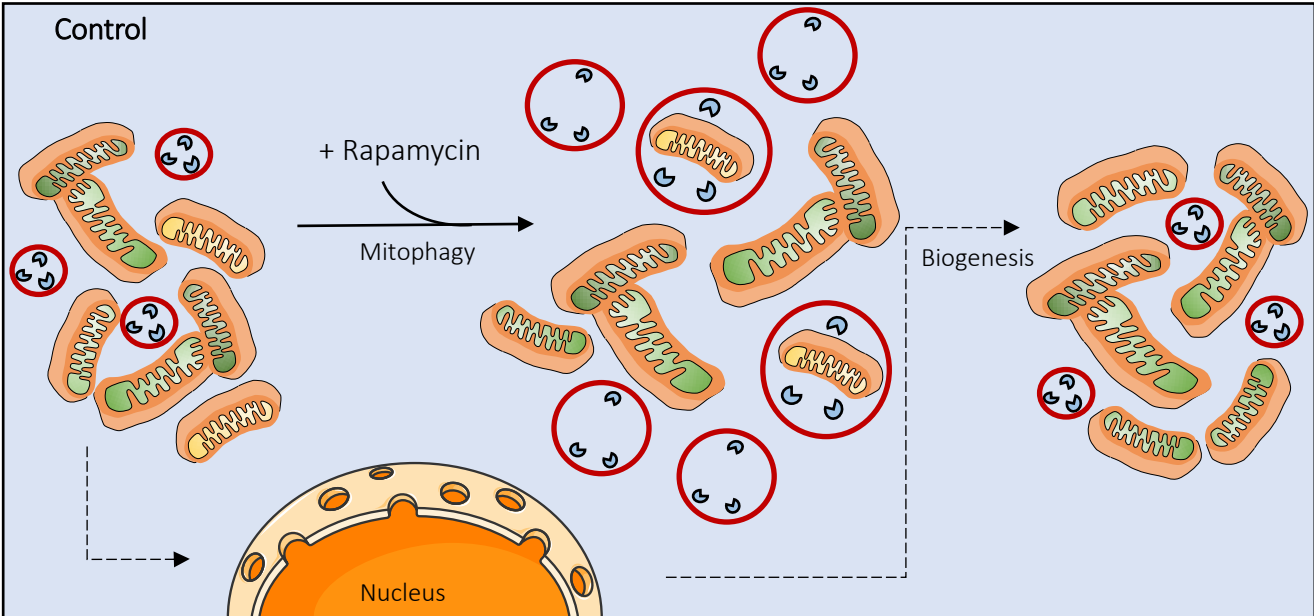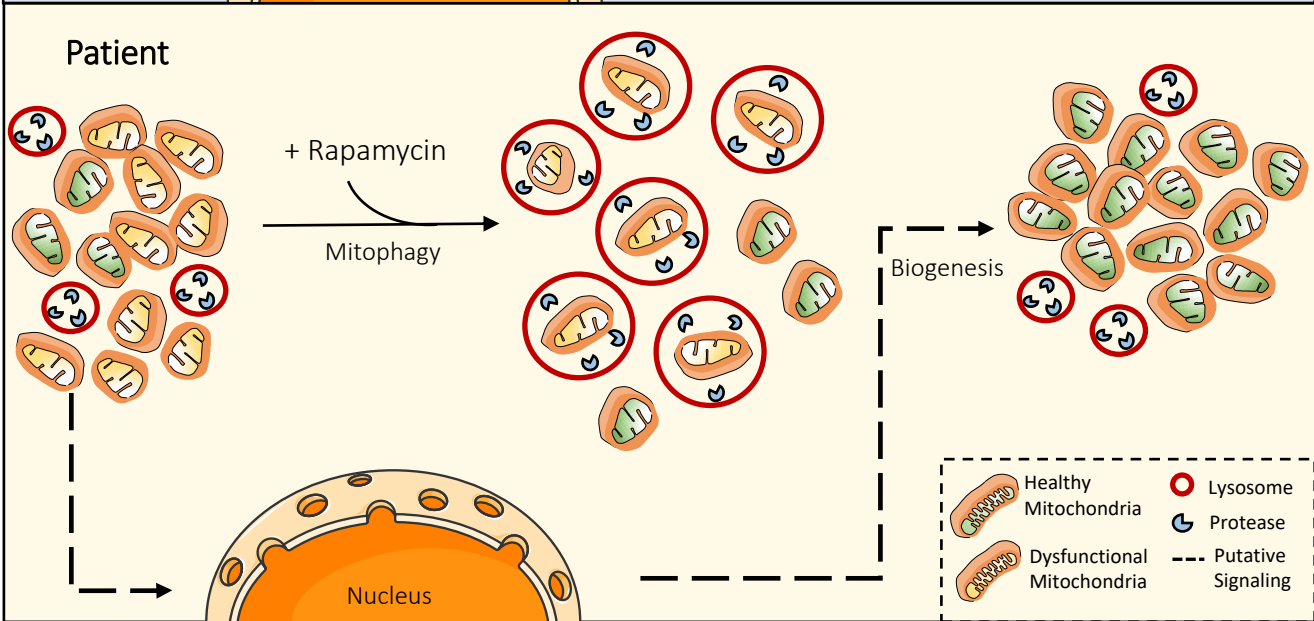

Source: https://biorxiv.org/content/10.1101/2021.03.31.437507v1.full.pdf
